# Supplementary material for: Thermal ecology of the Mexican Garter Snake (Thamnophis eques): temporal and spatial variations
Source: PeerJ. 2025 Jan 13;13:e18641. doi: 10.7717/peerj.18641 (PMC11737337; doi:10.7717/peerj.18641)
Supplement: Supplemental Information 1 — The raw data show the records obtained for snakes during all surveys. These data were used for the figures and statistical analysis. [file peerj-13-18641-s001.xlsx]

## Sheet: body
Tb (°C) of T. eques on grassland or forest, measured each 30-min
Month	Environment	Hour	Body temperature (°C)
May	Grassland	800	13
May	Grassland	800	12.4
May	Grassland	800	12.4
May	Grassland	800	12.4
May	Grassland	800	13.2
May	Grassland	800	15
May	Grassland	830	12.2
May	Grassland	830	12.6
May	Grassland	830	12.2
May	Grassland	830	12.6
May	Grassland	830	12.2
May	Grassland	830	12.2
May	Grassland	900	14
May	Grassland	900	13.4
May	Grassland	900	13.2
May	Grassland	900	13.4
May	Grassland	900	13.4
May	Grassland	900	13.4
May	Grassland	930	14
May	Grassland	930	14
May	Grassland	930	13.6
May	Grassland	930	14.2
May	Grassland	930	14
May	Grassland	930	14
May	Grassland	1000	16.2
May	Grassland	1000	17
May	Grassland	1000	15.2
May	Grassland	1000	32
May	Grassland	1000	14.8
May	Grassland	1030	25.6
May	Grassland	1030	20.4
May	Grassland	1030	19
May	Grassland	1030	34
May	Grassland	1030	18.2
May	Grassland	1100	32.2
May	Grassland	1100	31
May	Grassland	1100	31
May	Grassland	1100	32.2
May	Grassland	1100	31
May	Grassland	1130	34
May	Grassland	1130	29.2
May	Grassland	1130	31
May	Grassland	1130	32
May	Grassland	1130	30
May	Grassland	1200	35
May	Grassland	1200	30.2
May	Grassland	1200	33
May	Grassland	1200	33
May	Grassland	1200	34
May	Grassland	1230	33.8
May	Grassland	1230	33.6
May	Grassland	1230	33.4
May	Forest	800	19.4
May	Forest	800	23
May	Forest	800	20
May	Forest	800	17
May	Forest	800	20.2
May	Forest	800	20.2
May	Forest	830	27
May	Forest	830	27
May	Forest	830	25.8
May	Forest	830	27
May	Forest	830	26
May	Forest	830	26
May	Forest	900	25
May	Forest	900	30
May	Forest	900	32
May	Forest	900	28
May	Forest	900	32.2
May	Forest	900	31.2
May	Forest	930	29
May	Forest	930	32
May	Forest	930	31
May	Forest	930	34.2
May	Forest	930	30.2
May	Forest	930	32
May	Forest	1000	34
May	Forest	1000	33.6
May	Forest	1000	33.4
May	Forest	1000	34.2
May	Forest	1000	33
May	Forest	1030	29.2
May	Forest	1030	34
May	Forest	1030	33.2
May	Forest	1030	32
May	Forest	1030	32
May	Forest	1100	24.8
May	Forest	1100	35.2
May	Forest	1100	34.2
May	Forest	1100	34.8
May	Forest	1100	33.4
May	Forest	1130	33.8
May	Forest	1130	33.4
May	Forest	1130	32.2
May	Forest	1130	35.2
May	Forest	1130	35.2
May	Forest	1200	34.4
May	Forest	1200	33.8
May	Forest	1200	34
May	Forest	1200	35.6
May	Forest	1200	35.6
May	Forest	1230	33.8
May	Forest	1230	34
May	Forest	1230	35
May	Forest	1230	34
May	Forest	1230	34.4
June	Grassland	800	15
June	Grassland	800	14.2
June	Grassland	800	14.2
June	Grassland	800	14.8
June	Grassland	800	12.4
June	Grassland	830	14.8
June	Grassland	830	14.2
June	Grassland	830	14.8
June	Grassland	830	14.8
June	Grassland	830	15
June	Grassland	900	15.2
June	Grassland	900	14.4
June	Grassland	900	15
June	Grassland	900	15.4
June	Grassland	900	16
June	Grassland	930	16.2
June	Grassland	930	16
June	Grassland	930	17.2
June	Grassland	930	16.6
June	Grassland	1000	17.2
June	Grassland	1000	16.8
June	Grassland	1000	16.2
June	Grassland	1000	16.4
June	Grassland	1030	19.4
June	Grassland	1030	17.4
June	Grassland	1030	17
June	Grassland	1030	17.2
June	Grassland	1100	18.6
June	Grassland	1100	17.8
June	Grassland	1100	17.2
June	Grassland	1100	17
June	Grassland	1130	27.2
June	Grassland	1130	19.2
June	Grassland	1130	18.8
June	Grassland	1130	21
June	Grassland	1200	29.2
June	Grassland	1200	21.2
June	Grassland	1200	23.2
June	Grassland	1200	23.2
June	Grassland	1230	23.4
June	Grassland	1230	22.4
June	Grassland	1230	26.2
June	Grassland	1230	26.4
June	Forest	800	14.4
June	Forest	800	13.6
June	Forest	800	15.2
June	Forest	800	14
June	Forest	800	14.2
June	Forest	830	19.4
June	Forest	830	19.4
June	Forest	830	19.2
June	Forest	830	19.4
June	Forest	830	21.2
June	Forest	900	18.2
June	Forest	900	20.2
June	Forest	900	19.6
June	Forest	900	20.4
June	Forest	900	23.2
June	Forest	930	18.8
June	Forest	930	17.8
June	Forest	930	18
June	Forest	930	20.2
June	Forest	1000	19.2
June	Forest	1000	22.2
June	Forest	1000	18.8
June	Forest	1000	19.2
June	Forest	1030	23.2
June	Forest	1030	24.2
June	Forest	1030	24.2
June	Forest	1030	24.4
June	Forest	1100	24.2
June	Forest	1100	25.2
June	Forest	1100	24.8
June	Forest	1100	25.2
June	Forest	1130	28.8
June	Forest	1130	29.2
June	Forest	1130	31.2
June	Forest	1130	28
June	Forest	1200	29.4
June	Forest	1200	29.4
June	Forest	1200	27.8
June	Forest	1200	28.4
June	Forest	1230	26.2
June	Forest	1230	26.4
June	Forest	1230	28.2
June	Forest	1230	27.6
July	Grassland	800	15.2
July	Grassland	800	14.4
July	Grassland	800	14
July	Grassland	800	13.8
July	Grassland	800	14.4
July	Grassland	800	16
July	Grassland	830	14.4
July	Grassland	830	14.2
July	Grassland	830	13.6
July	Grassland	830	13.8
July	Grassland	830	13.8
July	Grassland	830	14.4
July	Grassland	900	14.2
July	Grassland	900	14.2
July	Grassland	900	14.4
July	Grassland	900	14.6
July	Grassland	900	14
July	Grassland	900	14.8
July	Grassland	930	15.2
July	Grassland	930	15.2
July	Grassland	930	15.2
July	Grassland	930	15.2
July	Grassland	930	16
July	Grassland	930	15
July	Grassland	1000	18.4
July	Grassland	1000	18
July	Grassland	1000	19
July	Grassland	1000	17
July	Grassland	1000	17.2
July	Grassland	1000	18
July	Grassland	1030	23.8
July	Grassland	1030	27
July	Grassland	1030	21.2
July	Grassland	1030	21.8
July	Grassland	1030	24.8
July	Grassland	1030	22
July	Grassland	1100	33
July	Grassland	1100	30
July	Grassland	1100	29.6
July	Grassland	1100	24.6
July	Grassland	1100	26
July	Grassland	1100	28
July	Grassland	1130	26.2
July	Grassland	1130	32
July	Grassland	1130	28.4
July	Grassland	1130	27
July	Grassland	1200	31.2
July	Grassland	1200	28.2
July	Grassland	1200	32
July	Grassland	1230	25
July	Grassland	1230	26
July	Grassland	1230	27
July	Forest	800	19.4
July	Forest	800	23
July	Forest	800	20
July	Forest	800	17
July	Forest	800	20.2
July	Forest	800	20.2
July	Forest	830	27
July	Forest	830	27
July	Forest	830	25.8
July	Forest	830	27
July	Forest	830	26
July	Forest	830	26
July	Forest	900	25
July	Forest	900	30
July	Forest	900	32
July	Forest	900	28
July	Forest	900	32.2
July	Forest	900	31.2
July	Forest	930	29
July	Forest	930	32
July	Forest	930	31
July	Forest	930	34.2
July	Forest	930	30.2
July	Forest	930	32
July	Forest	1000	34
July	Forest	1000	33.6
July	Forest	1000	33.4
July	Forest	1000	34.2
July	Forest	1000	33
July	Forest	1030	29.2
July	Forest	1030	34
July	Forest	1030	33.2
July	Forest	1030	32
July	Forest	1030	32
July	Forest	1100	24.8
July	Forest	1100	35.2
July	Forest	1100	34.2
July	Forest	1100	34.8
July	Forest	1100	33.4
July	Forest	1130	33.8
July	Forest	1130	33.4
July	Forest	1130	32.2
July	Forest	1130	35.2
July	Forest	1130	35.2
July	Forest	1200	34.4
July	Forest	1200	33.8
July	Forest	1200	34
July	Forest	1200	35.6
July	Forest	1200	35.6
July	Forest	1230	33.8
July	Forest	1230	34
July	Forest	1230	35
July	Forest	1230	34
July	Forest	1230	34.4
August	Grassland	800	12.8
August	Grassland	800	14
August	Grassland	800	13.8
August	Grassland	800	13.8
August	Grassland	800	14.4
August	Grassland	830	13
August	Grassland	830	13.8
August	Grassland	830	13.2
August	Grassland	830	14
August	Grassland	830	13.8
August	Grassland	900	14
August	Grassland	900	14
August	Grassland	900	14.4
August	Grassland	900	14.6
August	Grassland	900	14.2
August	Grassland	930	14
August	Grassland	930	14.6
August	Grassland	930	14.6
August	Grassland	930	14.4
August	Grassland	930	14.4
August	Grassland	1000	15.6
August	Grassland	1000	17
August	Grassland	1000	15.8
August	Grassland	1000	15.4
August	Grassland	1000	15.6
August	Grassland	1030	19
August	Grassland	1030	21
August	Grassland	1030	15.2
August	Grassland	1030	17.8
August	Grassland	1030	21.2
August	Grassland	1100	16
August	Grassland	1100	28
August	Grassland	1100	16.2
August	Grassland	1100	17.8
August	Grassland	1100	31
August	Grassland	1130	22
August	Grassland	1130	28.8
August	Grassland	1130	32.8
August	Grassland	1130	32.2
August	Grassland	1130	33
August	Grassland	1200	28
August	Grassland	1200	28
August	Grassland	1200	28
August	Grassland	1200	31
August	Grassland	1200	23
August	Grassland	1230	27.6
August	Grassland	1230	30.2
August	Grassland	1230	32
August	Grassland	1230	28.2
August	Grassland	1230	28.2
August	Grassland	800	13
August	Grassland	800	13.4
August	Grassland	800	13.2
August	Grassland	800	13.6
August	Grassland	800	14
August	Grassland	830	14
August	Grassland	830	14
August	Grassland	830	14
August	Grassland	830	14.6
August	Grassland	830	14.8
August	Grassland	900	14.8
August	Grassland	900	15.8
August	Grassland	900	15
August	Grassland	900	15.2
August	Grassland	900	16
August	Grassland	930	18.6
August	Grassland	930	18.4
August	Grassland	930	17.8
August	Grassland	930	17.6
August	Grassland	930	16.6
August	Grassland	1000	18.6
August	Grassland	1000	20
August	Grassland	1000	22.4
August	Grassland	1000	18.8
August	Grassland	1000	19.2
August	Grassland	1030	25.8
August	Grassland	1030	27.2
August	Grassland	1030	28.2
August	Grassland	1030	28.2
August	Grassland	1030	31.2
August	Grassland	1100	27.8
August	Grassland	1100	29.2
August	Grassland	1100	31
August	Grassland	1100	34
August	Grassland	1100	30.6
August	Grassland	1130	25
August	Grassland	1130	30
August	Grassland	1130	31.8
August	Grassland	1130	29.2
August	Grassland	1130	29.8
August	Grassland	1200	29
August	Grassland	1200	30.2
August	Grassland	1200	34
August	Grassland	1200	28
August	Grassland	1200	26
August	Grassland	1230	28.2
August	Grassland	1230	27.8
August	Grassland	1230	29.6
August	Grassland	1230	29.8
August	Grassland	1230	29.8
August	Grassland	800	12.8
August	Grassland	800	14
August	Grassland	800	13.8
August	Grassland	800	13.8
August	Grassland	800	14.4
August	Grassland	830	13
August	Grassland	830	13.8
August	Grassland	830	13.2
August	Grassland	830	14
August	Grassland	830	13.8
August	Grassland	900	14
August	Grassland	900	14
August	Grassland	900	14.4
August	Grassland	900	14.6
August	Grassland	900	14.2
August	Grassland	930	14
August	Grassland	930	14.6
August	Grassland	930	14.6
August	Grassland	930	14.4
August	Grassland	930	14.4
August	Grassland	1000	15.6
August	Grassland	1000	17
August	Grassland	1000	15.8
August	Grassland	1000	15.4
August	Grassland	1000	15.6
August	Grassland	1030	19
August	Grassland	1030	21
August	Grassland	1030	15.2
August	Grassland	1030	17.8
August	Grassland	1030	21.2
August	Grassland	1100	16
August	Grassland	1100	28
August	Grassland	1100	16.2
August	Grassland	1100	17.8
August	Grassland	1100	31
August	Grassland	1130	22
August	Grassland	1130	28.8
August	Grassland	1130	32.8
August	Grassland	1130	32.2
August	Grassland	1130	33
August	Grassland	1200	28
August	Grassland	1200	28
August	Grassland	1200	28
August	Grassland	1200	31
August	Grassland	1200	23
August	Grassland	1230	27.6
August	Grassland	1230	30.2
August	Grassland	1230	32
August	Grassland	1230	28.2
August	Grassland	1230	28.2
August	Forest	800	13
August	Forest	800	13.4
August	Forest	800	13.2
August	Forest	800	13.6
August	Forest	800	14
August	Forest	830	14
August	Forest	830	14
August	Forest	830	14
August	Forest	830	14.6
August	Forest	830	14.8
August	Forest	900	14.8
August	Forest	900	15.8
August	Forest	900	15
August	Forest	900	15.2
August	Forest	900	16
August	Forest	930	18.6
August	Forest	930	18.4
August	Forest	930	17.8
August	Forest	930	17.6
August	Forest	930	16.6
August	Forest	1000	18.6
August	Forest	1000	20
August	Forest	1000	22.4
August	Forest	1000	18.8
August	Forest	1000	19.2
August	Forest	1030	25.8
August	Forest	1030	27.2
August	Forest	1030	28.2
August	Forest	1030	28.2
August	Forest	1030	31.2
August	Forest	1100	27.8
August	Forest	1100	29.2
August	Forest	1100	31
August	Forest	1100	34
August	Forest	1100	30.6
August	Forest	1130	25
August	Forest	1130	30
August	Forest	1130	31.8
August	Forest	1130	29.2
August	Forest	1130	29.8
August	Forest	1200	29
August	Forest	1200	30.2
August	Forest	1200	34
August	Forest	1200	28
August	Forest	1200	26
August	Forest	1230	28.2
August	Forest	1230	27.8
August	Forest	1230	29.6
August	Forest	1230	29.8
August	Forest	1230	29.8
September	Grassland	800	12.8
September	Grassland	800	12.2
September	Grassland	800	11.8
September	Grassland	800	14.4
September	Grassland	800	14.8
September	Grassland	830	12.8
September	Grassland	830	13.8
September	Grassland	830	13.8
September	Grassland	830	13.4
September	Grassland	830	13.6
September	Grassland	900	14.2
September	Grassland	900	13
September	Grassland	900	14.4
September	Grassland	900	14.6
September	Grassland	900	14.2
September	Grassland	930	15.6
September	Grassland	930	13.8
September	Grassland	930	13.8
September	Grassland	930	13.6
September	Grassland	930	14.6
September	Grassland	1000	17.8
September	Grassland	1000	16.2
September	Grassland	1000	16.4
September	Grassland	1000	14.8
September	Grassland	1000	16.2
September	Grassland	1030	23.8
September	Grassland	1030	22.6
September	Grassland	1030	22.8
September	Grassland	1030	25.2
September	Grassland	1030	22.2
September	Grassland	1100	28
September	Grassland	1100	27.8
September	Grassland	1100	22.4
September	Grassland	1100	31.2
September	Grassland	1100	28.4
September	Grassland	1130	21.8
September	Grassland	1130	23.2
September	Grassland	1130	24.4
September	Grassland	1130	27.4
September	Grassland	1130	27.6
September	Grassland	1200	21.6
September	Grassland	1200	21.4
September	Grassland	1200	20.8
September	Grassland	1200	23.4
September	Grassland	1200	24.2
September	Grassland	1230	22.4
September	Grassland	1230	21.6
September	Grassland	1230	20.8
September	Grassland	1230	25.8
September	Grassland	1230	22.2
September	Forest	800	13.2
September	Forest	800	13.8
September	Forest	800	12.8
September	Forest	800	14.2
September	Forest	830	13.8
September	Forest	830	13.4
September	Forest	830	16
September	Forest	830	14.6
September	Forest	900	14.6
September	Forest	900	16.2
September	Forest	900	16.6
September	Forest	900	17.6
September	Forest	930	16.2
September	Forest	930	19.8
September	Forest	930	19
September	Forest	930	22.2
September	Forest	1000	17.8
September	Forest	1000	23.8
September	Forest	1000	24.6
September	Forest	1000	24.8
September	Forest	1030	24.8
September	Forest	1030	23.8
September	Forest	1030	28
September	Forest	1030	27.2
September	Forest	1100	24.2
September	Forest	1100	23.4
September	Forest	1100	25.2
September	Forest	1100	26.2
September	Forest	1130	29.8
September	Forest	1130	23.8
September	Forest	1130	30.2
September	Forest	1130	28.4
September	Forest	1200	26.8
September	Forest	1200	24.2
September	Forest	1200	28.2
September	Forest	1200	28.2
September	Forest	1230	22.2
September	Forest	1230	25.8
September	Forest	1230	23.8
September	Forest	1230	27.8
October	Grassland	800	9.4
October	Grassland	800	8.4
October	Grassland	800	6.4
October	Grassland	800	6.2
October	Grassland	800	10
October	Grassland	800	9.2
October	Grassland	830	8.8
October	Grassland	830	8.4
October	Grassland	830	8.4
October	Grassland	830	8.2
October	Grassland	830	9.6
October	Grassland	830	8.4
October	Grassland	900	9.4
October	Grassland	900	9.2
October	Grassland	900	9.6
October	Grassland	900	9.2
October	Grassland	900	9.6
October	Grassland	900	9
October	Grassland	930	10.6
October	Grassland	930	10.2
October	Grassland	930	9.8
October	Grassland	930	10.8
October	Grassland	930	10.2
October	Grassland	930	10.6
October	Grassland	1000	13.2
October	Grassland	1000	23.6
October	Grassland	1000	25.6
October	Grassland	1000	12.8
October	Grassland	1000	22.2
October	Grassland	1000	12.2
October	Grassland	1030	29
October	Grassland	1030	32.2
October	Grassland	1030	30
October	Grassland	1030	26.8
October	Grassland	1030	26.8
October	Grassland	1030	32
October	Grassland	1100	29.8
October	Grassland	1100	29.2
October	Grassland	1100	25.2
October	Grassland	1100	29.2
October	Grassland	1100	30.8
October	Grassland	1100	32.2
October	Grassland	1130	31.8
October	Grassland	1130	32
October	Grassland	1130	27.2
October	Grassland	1130	28.8
October	Grassland	1130	32.6
October	Grassland	1130	32.4
October	Grassland	1200	26.2
October	Grassland	1200	26.2
October	Grassland	1200	28.8
October	Grassland	1200	31.8
October	Grassland	1200	28.2
October	Grassland	1200	31.2
October	Grassland	1230	32
October	Grassland	1230	28.2
October	Grassland	1230	33
October	Grassland	1230	34
October	Grassland	1230	34
October	Grassland	1230	29.2
October	Forest	800	8.2
October	Forest	800	6.2
October	Forest	800	7.4
October	Forest	800	7.2
October	Forest	800	8.2
October	Forest	800	8.2
October	Forest	830	8.2
October	Forest	830	9.4
October	Forest	830	8.4
October	Forest	830	8.8
October	Forest	830	8.6
October	Forest	830	8.6
October	Forest	900	10.2
October	Forest	900	10.2
October	Forest	900	10.2
October	Forest	900	14.2
October	Forest	900	13.8
October	Forest	900	22.2
October	Forest	930	19.6
October	Forest	930	18.6
October	Forest	930	24.8
October	Forest	930	22.8
October	Forest	930	12.6
October	Forest	930	12.8
October	Forest	1000	24
October	Forest	1000	28.4
October	Forest	1000	28.6
October	Forest	1000	29.4
October	Forest	1000	14.2
October	Forest	1000	24.8
October	Forest	1030	23.8
October	Forest	1030	25.2
October	Forest	1030	29.2
October	Forest	1030	32.2
October	Forest	1030	22.2
October	Forest	1030	32.4
October	Forest	1100	28.2
October	Forest	1100	28.6
October	Forest	1100	30.2
October	Forest	1100	31.4
October	Forest	1100	31.4
October	Forest	1100	29.6
October	Forest	1130	28.2
October	Forest	1130	28.8
October	Forest	1130	28
October	Forest	1130	30.8
October	Forest	1130	28.6
October	Forest	1130	33
October	Forest	1200	30.4
October	Forest	1200	28
October	Forest	1200	26.2
October	Forest	1200	35
October	Forest	1200	29
October	Forest	1200	30.8
October	Forest	1230	32.8
October	Forest	1230	29.2
October	Forest	1230	32.8
October	Forest	1230	36
October	Forest	1230	33.2
November	Grassland	800	3.4
November	Grassland	800	5
November	Grassland	800	2.4
November	Grassland	800	6.4
November	Grassland	830	6.2
November	Grassland	830	5.6
November	Grassland	830	6
November	Grassland	830	5.6
November	Grassland	900	8.6
November	Grassland	900	9.4
November	Grassland	900	9.4
November	Grassland	900	9.8
November	Grassland	930	15.2
November	Grassland	930	15.2
November	Grassland	930	13.4
November	Grassland	930	13.4
November	Grassland	1000	21.6
November	Grassland	1000	20.4
November	Grassland	1000	19.4
November	Grassland	1000	18
November	Grassland	1030	23
November	Grassland	1030	21.2
November	Grassland	1030	22.4
November	Grassland	1030	22.2
November	Grassland	1100	27
November	Grassland	1100	26.2
November	Grassland	1100	26.2
November	Grassland	1100	18
November	Grassland	1130	26.2
November	Grassland	1130	23.4
November	Grassland	1130	30
November	Grassland	1130	25.6
November	Grassland	1200	29
November	Grassland	1200	25
November	Grassland	1200	31
November	Grassland	1200	27
November	Grassland	1230	27
November	Grassland	1230	29
November	Grassland	1230	22
November	Grassland	1230	27
November	Forest	800	3.8
November	Forest	800	2.6
November	Forest	800	4
November	Forest	800	4
November	Forest	800	4
November	Forest	830	8
November	Forest	830	7.8
November	Forest	830	6
November	Forest	830	8
November	Forest	830	7.2
November	Forest	900	12.6
November	Forest	900	6
November	Forest	900	10.2
November	Forest	900	12.2
November	Forest	900	18
November	Forest	930	13.2
November	Forest	930	10.6
November	Forest	930	12.8
November	Forest	930	14.2
November	Forest	930	15.6
November	Forest	1000	14.4
November	Forest	1000	11.6
November	Forest	1000	17.6
November	Forest	1000	18.5
November	Forest	1030	24.4
November	Forest	1030	21.7
November	Forest	1030	22.2
November	Forest	1030	25.8
November	Forest	1100	24.2
November	Forest	1100	25.6
November	Forest	1100	23.6
November	Forest	1100	23.8
November	Forest	1130	26.4
November	Forest	1130	24.6
November	Forest	1130	25.8
November	Forest	1130	23.8
November	Forest	1200	26.8
November	Forest	1200	29.4
November	Forest	1200	27.2
November	Forest	1200	27.6
November	Forest	1230	25.6
November	Forest	1230	30.2
November	Forest	1230	26.8
November	Forest	1230	29.4

## Sheet: substrate
Month	Hour	Tsubstrate forest	Tb average forest	Tsubstrate grassland	Tb average grassland
May	800	12	13.06	15	19.96
May	830	12.2	12.33	18	26.46
May	900	13	13.46	20.6	29.73
May	930	16	14.06	20.4	31.4
May	1000	20	17.48	26.2	33.64
May	1030	24	23.44	25	32.08
May	1100	24	31.48	28	32.48
May	1130	28	31.24	29.2	33.96
May	1200	26	33.04	30	34.68
May	1230	28	33.7	31.6	34.24
June	800	13	14.1	13.8	14.3
June	830	14	14.7	14.4	19.7
June	900	14.4	15.2	15	20.3
June	930	16	16.5	16.2	18.7
June	1000	16	16.7	17.8	19.9
June	1030	18	17.8	19.2	24
June	1100	19.3	17.7	20	24.9
June	1130	18.6	21.6	21.2	29.3
June	1200	20.8	24.2	23	28.8
June	1230	22	24.6	23	27.1
July	800	12.8	14.6	14	17.4
July	830	13	14.1	16	18.9
July	900	14.8	14.4	17.2	20.3
July	930	15	15.3	20.2	27
July	1000	16.2	17.9	19	25.6
July	1030	20	23.4	22.4	28.9
July	1100	20	28.5	22.8	30.2
July	1130	22	28.4	25	29.5
July	1200	22.4	30.5	22	29.9
July	1230	20	26	23	28.9
August	800	14	13.8	13	13.5
August	830	12.8	13.6	14	14.3
August	900	13	14.2	16	15.4
August	930	14	14.4	17	17.8
August	1000	15.8	15.9	18	19.8
August	1030	16	18.8	21	28.1
August	1100	19	21.8	20.4	30.5
August	1130	20.4	29.8	21.6	29.2
August	1200	21.2	27.6	22.4	29.5
August	1230	21.4	29.3	24	29.1
September	800	12	13.2	13.2	13.5
September	830	15	13.5	14	14.5
September	900	14	14.1	16.6	16.3
September	930	14.2	14.3	18	19.3
September	1000	17	16.3	17.8	22.8
September	1030	17.6	23.3	19.2	26
September	1100	19.8	27.6	21.8	24.8
September	1130	20.2	24.9	21.2	28.1
September	1200	17.8	22.3	20.8	26.9
September	1230	18.8	22.6	19.4	24.9
October	800	4	8.3	7.2	7.6
October	830	6.4	8.6	9.2	8.7
October	900	8.8	9.3	12	13.5
October	930	11	10.4	16	18.5
October	1000	13	18.3	16.4	24.9
October	1030	16.2	29.5	18	27.5
October	1100	20	29.4	21.2	29.9
October	1130	21	30.8	21	29.7
October	1200	23	28.7	25	29.9
October	1230	24	31.7	24.4	32.8
November	800	1	4.3	4.2	3.7
November	830	4	5.9	8.4	7.8
November	900	7.8	9.3	9.3	8.2
November	930	11.8	14.3	13	13.3
November	1000	14.2	19	12.3	15.5
November	1030	14.6	22.2	15.6	23.5
November	1100	16.8	24.4	17.2	24.6
November	1130	18	26.3	18.5	25.2
November	1200	19	28	19.6	27.7
November	1230	18	26.3	19.8	28
