# Supplementary material for: Thermal ecology of the Mexican Garter Snake (Thamnophis eques): temporal and spatial variations
Source: PeerJ. 2025 Jan 13;13:e18641. doi: 10.7717/peerj.18641 (PMC11737337; doi:10.7717/peerj.18641)
Supplement: Supplemental Information 2 [file peerj-13-18641-s002.xlsx]

## Sheet: Month-Environment
Source variation	Wilks value	F	Effect degree freedom	Error degree freedom	Probability		800	Month	Environment	Forest	Grassland	Forest	Grassland	Forest	Grassland	Forest	Grassland	Forest	Grassland	Forest	Grassland	Forest	Grassland
Month	0	17.73	60	240.8	0.000*			may	Forest		0.000132638	0.000133635	0.000132889	0.000132684	0.0620473	0.000132638	0.000132638	0.000132638	0.00013264	0.000132638	0.000132638	0.000132638	0.000132638
Environment	0.538	3.86	10	45	0.001*			may	Grassland	0.000132638		0.886236	0.969978	0.715046	0.000152795	0.999673	1	1	1	0.000133801	0.000132651	0.000133801	0.000132651
Month Environment	0.002	9.83	60	240.8	0.000*			jun	Forest	0.000133635	0.886236		1	1	0.064415	0.999508	0.986301	0.935722	0.991626	0.000132645	0.000132638	0.000132645	0.000132638
								jun	Grassland	0.000132889	0.969978	1		1	0.0287401	0.999993	0.998795	0.987334	0.999438	0.000132667	0.000132639	0.000132667	0.000132639
								jul	Forest	0.000132684	0.715046	1	1		0.0294016	0.995738	0.940907	0.810664	0.983619	0.000132638	0.000132638	0.000132638	0.000132638
								jul	Grassland	0.0620473	0.000152795	0.064415	0.0287401	0.0294016		0.000818052	0.000274895	0.000171487	0.00153736	0.000132638	0.000132638	0.000132638	0.000132638
								aug	Forest	0.000132638	0.999673	0.999508	0.999993	0.995738	0.000818052		1	0.999962	1	0.000132653	0.000132638	0.000132653	0.000132638
								aug	Grassland	0.000132638	1	0.986301	0.998795	0.940907	0.000274895	1		1	1	0.000132762	0.000132639	0.000132762	0.000132639
								sep	Forest	0.000132638	1	0.935722	0.987334	0.810664	0.000171487	0.999962	1		1	0.000133198	0.000132644	0.000133198	0.000132644
								sep	Grassland	0.00013264	1	0.991626	0.999438	0.983619	0.00153736	1	1	1		0.000135202	0.00013269	0.000135202	0.00013269
								oct	Forest	0.000132638	0.000133801	0.000132645	0.000132667	0.000132638	0.000132638	0.000132653	0.000132762	0.000133198	0.000135202		0.99884	1	0.99884
								oct	Grassland	0.000132638	0.000132651	0.000132638	0.000132639	0.000132638	0.000132638	0.000132638	0.000132639	0.000132644	0.00013269	0.99884		0.99884	1
								nov	Forest	0.000132638	0.000133801	0.000132645	0.000132667	0.000132638	0.000132638	0.000132653	0.000132762	0.000133198	0.000135202	1	0.99884		0.99884
								nov	Grassland	0.000132638	0.000132651	0.000132638	0.000132639	0.000132638	0.000132638	0.000132638	0.000132639	0.000132644	0.00013269	0.99884	1	0.99884
							830	Month	Environment	Forest	Grassland	Forest	Grassland	Forest	Grassland	Forest	Grassland	Forest	Grassland	Forest	Grassland	Forest	Grassland
								may	Forest		0.000135062	0.000135062	0.000135062	0.000135062	0.000135062	0.000135062	0.000135062	0.000135062	0.000135062	0.000135062	0.000135062	0.000135062	0.000135062
								may	Grassland	0.000135062		0.000533388	0.000135062	0.00879786	0.000135062	0.186626	0.00134254	0.275611	0.00196813	0.000135062	0.000135062	0.000135062	0.000135062
								jun	Forest	0.000135062	0.000533388		0.000135062	0.982796	0.000135062	0.492165	0.999896	0.377747	1	0.000135062	0.000135062	0.000135062	0.000135062
								jun	Grassland	0.000135062	0.000135062	0.000135062		0.000135062	0.99947	0.000135062	0.000135062	0.000135062	0.000135062	0.000135062	0.000135062	0.000135062	0.000135062
								jul	Forest	0.000135062	0.00879786	0.982796	0.000135062		0.000135062	0.995647	0.999997	0.982326	0.99962	0.000135062	0.000135062	0.000135062	0.000135062
								jul	Grassland	0.000135062	0.000135062	0.000135062	0.99947	0.000135062		0.000135062	0.000135062	0.000135062	0.000135062	0.000135062	0.000135062	0.000135062	0.000135062
								aug	Forest	0.000135062	0.186626	0.492165	0.000135062	0.995647	0.000135062		0.877856	1	0.78346	0.000135062	0.000135062	0.000135062	0.000135062
								aug	Grassland	0.000135062	0.00134254	0.999896	0.000135062	0.999997	0.000135062	0.877856		0.777813	1	0.000135062	0.000135062	0.000135062	0.000135062
								sep	Forest	0.000135062	0.275611	0.377747	0.000135062	0.982326	0.000135062	1	0.777813		0.673074	0.000135062	0.000135062	0.000135062	0.000135062
								sep	Grassland	0.000135062	0.00196813	1	0.000135062	0.99962	0.000135062	0.78346	1	0.673074		0.000135062	0.000135062	0.000135062	0.000135062
								oct	Forest	0.000135062	0.000135062	0.000135062	0.000135062	0.000135062	0.000135062	0.000135062	0.000135062	0.000135062	0.000135062		1	0.000140517	0.359964
								oct	Grassland	0.000135062	0.000135062	0.000135062	0.000135062	0.000135062	0.000135062	0.000135062	0.000135062	0.000135062	0.000135062	1		0.000139055	0.31749
								nov	Forest	0.000135062	0.000135062	0.000135062	0.000135062	0.000135062	0.000135062	0.000135062	0.000135062	0.000135062	0.000135062	0.000140517	0.000139055		0.0480597
								nov	Grassland	0.000135062	0.000135062	0.000135062	0.000135062	0.000135062	0.000135062	0.000135062	0.000135062	0.000135062	0.000135062	0.359964	0.31749	0.0480597
							900	Month	Environment	Forest	Grassland	Forest	Grassland	Forest	Grassland	Forest	Grassland	Forest	Grassland	Forest	Grassland	Forest	Grassland
								may	Forest		0.000135062	0.000135062	0.000135076	0.000135062	0.000135065	0.000135062	0.000135062	0.000135062	0.000135062	0.000135062	0.000135062	0.000135062	0.000135062
								may	Grassland	0.000135062		0.991137	0.00110333	0.999802	0.000145617	0.999956	0.900593	0.999996	0.617682	0.05754	1	0.131254	0.501467
								jun	Forest	0.000135062	0.991137		0.0472233	1	0.00984185	0.999998	1	0.99998	0.999393	0.00434948	0.995228	0.00401876	0.0346333
								jun	Grassland	0.000135076	0.00110333	0.0472233		0.0119975	0.999999	0.00897327	0.0950227	0.00616782	0.381245	0.000135063	0.00142838	0.000135063	0.00013511
								jul	Forest	0.000135062	0.999802	1	0.0119975		0.000451656	1	0.999829	1	0.971322	0.00132823	0.999842	0.0174603	0.118805
								jul	Grassland	0.000135065	0.000145617	0.00984185	0.999999	0.000451656		0.000345474	0.00581051	0.000257972	0.128986	0.000135062	0.000150448	0.000135062	0.000135065
								aug	Forest	0.000135062	0.999956	0.999998	0.00897327	1	0.000345474		0.999382	1	0.952683	0.00669949	0.99999	0.0230715	0.148097
								aug	Grassland	0.000135062	0.900593	1	0.0950227	0.999829	0.00581051	0.999382		0.99757	0.999986	0.000383514	0.931272	0.00169694	0.0158542
								sep	Forest	0.000135062	0.999996	0.99998	0.00616782	1	0.000257972	1	0.99757		0.918499	0.0101414	0.999999	0.0325111	0.192679
								sep	Grassland	0.000135062	0.617682	0.999393	0.381245	0.971322	0.128986	0.952683	0.999986	0.918499		0.000281345	0.673161	0.00026785	0.00195621
								oct	Forest	0.000135062	0.05754	0.00434948	0.000135063	0.00132823	0.000135062	0.00669949	0.000383514	0.0101414	0.000281345		0.0176312	1	0.99998
								oct	Grassland	0.000135062	1	0.995228	0.00142838	0.999842	0.000150448	0.99999	0.931272	0.999999	0.673161	0.0176312		0.108637	0.446628
								nov	Forest	0.000135062	0.131254	0.00401876	0.000135063	0.0174603	0.000135062	0.0230715	0.00169694	0.0325111	0.00026785	1	0.108637		0.99997
								nov	Grassland	0.000135062	0.501467	0.0346333	0.00013511	0.118805	0.000135065	0.148097	0.0158542	0.192679	0.00195621	0.99998	0.446628	0.99997
							930	Month	Environment	Forest	Grassland	Forest	Grassland	Forest	Grassland	Forest	Grassland	Forest	Grassland	Forest	Grassland	Forest	Grassland
								may	Forest		0.000135062	0.000135062	0.000135062	0.000135062	0.0616111	0.000135062	0.000135062	0.000135062	0.000135062	0.000135062	0.000135062	0.000135062	0.000135062
								may	Grassland	0.000135062		0.885598	0.0906062	0.998659	0.000135062	1	0.18255	1	0.0307926	0.26699	0.04708	1	0.999785
								jun	Forest	0.000135062	0.885598		0.957742	0.999874	0.000135091	0.970524	0.999699	0.954771	0.798307	0.00617357	0.97727	0.957742	0.348999
								jun	Grassland	0.000135062	0.0906062	0.957742		0.527828	0.000160142	0.180767	0.999995	0.151206	1	0.000160612	1	0.155854	0.00818848
								jul	Forest	0.000135062	0.998659	0.999874	0.527828		0.000135062	0.999983	0.800195	0.999929	0.273088	0.0075004	0.287372	0.999984	0.867863
								jul	Grassland	0.0616111	0.000135062	0.000135091	0.000160142	0.000135062		0.000135062	0.000135121	0.000135062	0.000261991	0.000135062	0.000135871	0.000135062	0.000135062
								aug	Forest	0.000135062	1	0.970524	0.180767	0.999983	0.000135062		0.348464	1	0.0689409	0.131672	0.11019	1	0.995327
								aug	Grassland	0.000135062	0.18255	0.999699	0.999995	0.800195	0.000135121	0.348464		0.296362	0.998643	0.000162268	0.999998	0.480807	0.0482233
								sep	Forest	0.000135062	1	0.954771	0.151206	0.999929	0.000135062	1	0.296362		0.055772	0.16176	0.0883006	1	0.997718
								sep	Grassland	0.000135062	0.0307926	0.798307	1	0.273088	0.000261991	0.0689409	0.998643	0.055772		0.000139662	0.999999	0.0577998	0.0022591
								oct	Forest	0.000135062	0.26699	0.00617357	0.000160612	0.0075004	0.000135062	0.131672	0.000162268	0.16176	0.000139662		0.000135234	0.297156	0.935051
								oct	Grassland	0.000135062	0.04708	0.97727	1	0.287372	0.000135871	0.11019	0.999998	0.0883006	0.999999	0.000135234		0.198974	0.0115609
								nov	Forest	0.000135062	1	0.957742	0.155854	0.999984	0.000135062	1	0.480807	1	0.0577998	0.297156	0.198974		0.997407
								nov	Grassland	0.000135062	0.999785	0.348999	0.00818848	0.867863	0.000135062	0.995327	0.0482233	0.997718	0.0022591	0.935051	0.0115609	0.997407
							1000	Month	Environment	Forest	Grassland	Forest	Grassland	Forest	Grassland	Forest	Grassland	Forest	Grassland	Forest	Grassland	Forest	Grassland
								may	Forest		0.000135867	0.0001353	0.000192779	0.000135143	0.039198	0.000135062	0.000138656	0.000135064	0.0039148	0.000135226	0.0153474	0.000192779	0.000135089
								may	Grassland	0.000135867		0.999376	1	1	0.180749	0.974848	1	0.992143	0.963006	1	0.341749	1	0.975867
								jun	Forest	0.0001353	0.999376		0.989128	1	0.0372924	1	0.990543	1	0.455564	0.999992	0.0808311	0.989128	1
								jun	Grassland	0.000192779	1	0.989128		0.999944	0.540145	0.938872	1	0.972651	0.995586	0.999994	0.740031	1	0.891072
								jul	Forest	0.000135143	1	1	0.999944		0.0556635	0.999591	0.999854	0.999963	0.795653	1	0.0607336	0.999944	0.999324
								jul	Grassland	0.039198	0.180749	0.0372924	0.540145	0.0556635		0.00380899	0.347007	0.00664677	0.995728	0.0813428	1	0.540145	0.0101956
								aug	Forest	0.000135062	0.974848	1	0.938872	0.999591	0.00380899		0.8816	1	0.271882	0.998054	0.0105739	0.938872	1
								aug	Grassland	0.000138656	1	0.990543	1	0.999854	0.347007	0.8816		0.942577	0.994813	0.999984	0.564602	1	0.89889
								sep	Forest	0.000135064	0.992143	1	0.972651	0.999963	0.00664677	1	0.942577		0.361168	0.999713	0.0179511	0.972651	1
								sep	Grassland	0.0039148	0.963006	0.455564	0.995586	0.795653	0.995728	0.271882	0.994813	0.361168		0.863941	0.999798	0.995586	0.205561
								oct	Forest	0.000135226	1	0.999992	0.999994	1	0.0813428	0.998054	0.999984	0.999713	0.863941		0.0914773	0.999994	0.997443
								oct	Grassland	0.0153474	0.341749	0.0808311	0.740031	0.0607336	1	0.0105739	0.564602	0.0179511	0.999798	0.0914773		0.740031	0.0242769
								nov	Forest	0.000192779	1	0.989128	1	0.999944	0.540145	0.938872	1	0.972651	0.995586	0.999994	0.740031		0.891072
								nov	Grassland	0.000135089	0.975867	1	0.891072	0.999324	0.0101956	1	0.89889	1	0.205561	0.997443	0.0242769	0.891072
							1030	Month	Environment	Forest	Grassland	Forest	Grassland	Forest	Grassland	Forest	Grassland	Forest	Grassland	Forest	Grassland	Forest	Grassland
								may	Forest		0.00160605	0.00013522	0.016635	0.0015884	0.903775	0.000135116	0.670669	0.00131814	0.183512	0.976221	0.442563	0.00115046	0.000135062
								may	Grassland	0.00160605		0.279545	1	1	0.184104	0.435499	0.407578	1	0.99367	0.0944418	0.634168	0.999997	0.0209349
								jun	Forest	0.00013522	0.279545		0.162149	0.281212	0.000238819	0.999999	0.00057986	0.310504	0.0140361	0.00017208	0.00140586	0.663361	0.998029
								jun	Grassland	0.016635	1	0.162149		1	0.507526	0.430146	0.765156	1	0.999496	0.338728	0.909531	0.999786	0.00945722
								jul	Forest	0.0015884	1	0.281212	1		0.182708	0.437847	0.405294	1	0.993514	0.0423253	0.487629	0.999997	0.0211282
								jul	Grassland	0.903775	0.184104	0.000238819	0.507526	0.182708		0.000221276	1	0.160293	0.972864	1	0.999947	0.0964388	0.000136294
								aug	Forest	0.000135116	0.435499	0.999999	0.430146	0.437847	0.000221276		0.000575822	0.478455	0.0603833	0.000162015	0.00155373	0.931459	0.937673
								aug	Grassland	0.670669	0.407578	0.00057986	0.765156	0.405294	1	0.000575822		0.367369	0.998464	0.999971	1	0.225814	0.000141584
								sep	Forest	0.00131814	1	0.310504	1	1	0.160293	0.478455	0.367369		0.990321	0.0806377	0.589623	0.999999	0.0246777
								sep	Grassland	0.183512	0.99367	0.0140361	0.999496	0.993514	0.972864	0.0603833	0.998464	0.990321		0.906649	0.99996	0.860295	0.000540063
								oct	Forest	0.976221	0.0944418	0.00017208	0.338728	0.0423253	1	0.000162015	0.999971	0.0806377	0.906649		0.995694	0.0495687	0.000135439
								oct	Grassland	0.442563	0.634168	0.00140586	0.909531	0.487629	0.999947	0.00155373	1	0.589623	0.99996	0.995694		0.387069	0.000157504
								nov	Forest	0.00115046	0.999997	0.663361	0.999786	0.999997	0.0964388	0.931459	0.225814	0.999999	0.860295	0.0495687	0.387069		0.10159
								nov	Grassland	0.000135062	0.0209349	0.998029	0.00945722	0.0211282	0.000136294	0.937673	0.000141584	0.0246777	0.000540063	0.000135439	0.000157504	0.10159
							1100	Month	Environment	Forest	Grassland	Forest	Grassland	Forest	Grassland	Forest	Grassland	Forest	Grassland	Forest	Grassland	Forest	Grassland
								may	Forest		0.999999	0.000135206	0.0420377	0.718425	0.993582	0.000183858	0.998773	0.377835	0.0370453	0.934651	0.983527	0.0219947	0.0205744
								may	Grassland	0.999999		0.000136273	0.134444	0.95256	0.999984	0.000498395	1	0.727293	0.120757	0.997763	0.999877	0.0770729	0.0727017
								jun	Forest	0.000135206	0.000136273		0.0710139	0.000463613	0.000151813	0.792697	0.000143414	0.00174442	0.0798023	0.000204247	0.000162488	0.124724	0.13156
								jun	Grassland	0.0420377	0.134444	0.0710139		0.897105	0.434495	0.973882	0.33084	0.990439	1	0.676407	0.51606	1	1
								jul	Forest	0.718425	0.95256	0.000463613	0.897105		0.99983	0.0477449	0.998583	1	0.878154	1	0.999932	0.783788	0.77012
								jul	Grassland	0.993582	0.999984	0.000151813	0.434495	0.99983		0.00397544	1	0.982419	0.404313	1	1	0.294592	0.282257
								aug	Forest	0.000183858	0.000498395	0.792697	0.973882	0.0477449	0.00397544		0.00220243	0.163654	0.980113	0.0133576	0.00606529	0.994516	0.995448
								aug	Grassland	0.998773	1	0.000143414	0.33084	0.998583	1	0.00220243		0.950949	0.304693	0.999998	1	0.213156	0.203249
								sep	Forest	0.377835	0.727293	0.00174442	0.990439	1	0.982419	0.163654	0.950949		0.98684	0.999364	0.993044	0.960992	0.956142
								sep	Grassland	0.0370453	0.120757	0.0798023	1	0.878154	0.404313	0.980113	0.304693	0.98684		0.644924	0.484218	1	1
								oct	Forest	0.934651	0.997763	0.000204247	0.676407	1	1	0.0133576	0.999998	0.999364	0.644924		1	0.51606	0.500079
								oct	Grassland	0.983527	0.999877	0.000162488	0.51606	0.999932	1	0.00606529	1	0.993044	0.484218	1		0.36382	0.349872
								nov	Forest	0.0219947	0.0770729	0.124724	1	0.783788	0.294592	0.994516	0.213156	0.960992	1	0.51606	0.36382		1
								nov	Grassland	0.0205744	0.0727017	0.13156	1	0.77012	0.282257	0.995448	0.203249	0.956142	1	0.500079	0.349872	1
							1130	Month	Environment	Forest	Grassland	Forest	Grassland	Forest	Grassland	Forest	Grassland	Forest	Grassland	Forest	Grassland	Forest	Grassland
								may	Forest		0.903472	0.00013519	0.352945	0.0522654	0.238888	0.341164	0.164248	0.000166613	0.0809112	0.76904	0.274775	0.00502815	0.000689712
								may	Grassland	0.903472		0.000222383	0.997747	0.873148	0.996924	0.999565	0.987671	0.012797	0.869501	1	0.998432	0.266784	0.0627774
								jun	Forest	0.00013519	0.000222383		0.00428593	0.01962	0.00329117	0.00191217	0.00547994	0.832036	0.0340639	0.000361805	0.00268381	0.323699	0.746305
								jun	Grassland	0.352945	0.997747	0.00428593		1	1	1	1	0.437225	0.999981	0.999849	1	0.91174	0.539466
								jul	Forest	0.0522654	0.873148	0.01962	1		0.999991	0.999825	1	0.622572	1	0.923089	0.999912	0.995115	0.854082
								jul	Grassland	0.238888	0.996924	0.00329117	1	0.999991		1	1	0.221765	0.99993	0.999838	1	0.879233	0.481966
								aug	Forest	0.341164	0.999565	0.00191217	1	0.999825	1		1	0.147168	0.999384	0.999992	1	0.792778	0.369782
								aug	Grassland	0.164248	0.987671	0.00547994	1	1	1	1		0.312654	0.999995	0.99872	1	0.936431	0.593779
								sep	Forest	0.000166613	0.012797	0.832036	0.437225	0.622572	0.221765	0.147168	0.312654		0.874425	0.0283275	0.191001	0.999918	1
								sep	Grassland	0.0809112	0.869501	0.0340639	0.999981	1	0.99993	0.999384	0.999995	0.874425		0.952165	0.99983	0.999217	0.929918
								oct	Forest	0.76904	1	0.000361805	0.999849	0.923089	0.999838	0.999992	0.99872	0.0283275	0.952165		0.999837	0.408172	0.114843
								oct	Grassland	0.274775	0.998432	0.00268381	1	0.999912	1	1	1	0.191001	0.99983	0.999837		0.849628	0.438447
								nov	Forest	0.00502815	0.266784	0.323699	0.91174	0.995115	0.879233	0.792778	0.936431	0.999918	0.999217	0.408172	0.849628		0.999993
								nov	Grassland	0.000689712	0.0627774	0.746305	0.539466	0.854082	0.481966	0.369782	0.593779	1	0.929918	0.114843	0.438447	0.999993
							1200	Month	Environment	Forest	Grassland	Forest	Grassland	Forest	Grassland	Forest	Grassland	Forest	Grassland	Forest	Grassland	Forest	Grassland
								may	Forest		0.994142	0.000135262	0.0173579	0.139046	0.0456726	0.000364382	0.019876	0.000135062	0.000416188	0.00417826	0.0503443	0.00392021	0.00234774
								may	Grassland	0.994142		0.000156443	0.247413	0.823334	0.533577	0.0129594	0.339589	0.000135063	0.0105045	0.118915	0.55887	0.0836332	0.0552714
								jun	Forest	0.000135262	0.000156443		0.175017	0.00903309	0.0292412	0.608971	0.0601598	0.991072	0.891918	0.179121	0.0266846	0.430686	0.541047
								jun	Grassland	0.0173579	0.247413	0.175017		0.996871	0.999974	0.999956	1	0.00601166	0.991874	1	0.999956	1	0.999991
								jul	Forest	0.139046	0.823334	0.00903309	0.996871		1	0.695207	0.999957	0.000144266	0.511023	0.978763	1	0.933107	0.873762
								jul	Grassland	0.0456726	0.533577	0.0292412	0.999974	1		0.923362	1	0.000192223	0.778734	0.99989	1	0.993641	0.98059
								aug	Forest	0.000364382	0.0129594	0.608971	0.999956	0.695207	0.923362		0.983677	0.016776	1	0.99987	0.911124	1	1
								aug	Grassland	0.019876	0.339589	0.0601598	1	0.999957	1	0.983677		0.00031586	0.906805	0.999999	1	0.999483	0.997321
								sep	Forest	0.000135062	0.000135063	0.991072	0.00601166	0.000144266	0.000192223	0.016776	0.00031586		0.170186	0.0013181	0.000184562	0.0257205	0.0403975
								sep	Grassland	0.000416188	0.0105045	0.891918	0.991874	0.511023	0.778734	1	0.906805	0.170186		0.9925	0.759306	0.999956	0.999998
								oct	Forest	0.00417826	0.118915	0.179121	1	0.978763	0.99989	0.99987	0.999999	0.0013181	0.9925		0.999524	1	0.999993
								oct	Grassland	0.0503443	0.55887	0.0266846	0.999956	1	1	0.911124	1	0.000184562	0.759306	0.999524		0.991874	0.976438
								nov	Forest	0.00392021	0.0836332	0.430686	1	0.933107	0.993641	1	0.999483	0.0257205	0.999956	1	0.991874		1
								nov	Grassland	0.00234774	0.0552714	0.541047	0.999991	0.873762	0.98059	1	0.997321	0.0403975	0.999998	0.999993	0.976438	1
							1230	Month	Environment	Forest	Grassland	Forest	Grassland	Forest	Grassland	Forest	Grassland	Forest	Grassland	Forest	Grassland	Forest	Grassland
								may	Forest		0.999843	0.000135064	0.000159096	0.000135075	0.000989005	0.00256469	0.00146475	0.000135062	0.000135069	0.585228	0.988091	0.000136386	0.000533307
								may	Grassland	0.999843		0.000135157	0.000576343	0.000135765	0.0133762	0.0321675	0.0193445	0.000135062	0.000135356	0.975227	1	0.00016683	0.00528606
								jun	Forest	0.000135064	0.000135157		0.747415	0.996727	0.0545942	0.0259064	0.0404184	0.923875	1	0.000159623	0.000135684	0.98527	0.280629
								jun	Grassland	0.000159096	0.000576343	0.747415		0.99973	0.969807	0.895438	0.946649	0.0324327	0.875596	0.0263009	0.00194344	0.999985	0.999971
								jul	Forest	0.000135075	0.000135765	0.996727	0.99973		0.35137	0.197373	0.281122	0.133548	0.99973	0.000170297	0.000135451	1	0.933644
								jul	Grassland	0.000989005	0.0133762	0.0545942	0.969807	0.35137		1	1	0.00016349	0.0999579	0.387878	0.0480026	0.669359	0.999971
								aug	Forest	0.00256469	0.0321675	0.0259064	0.895438	0.197373	1		1	0.000143143	0.050144	0.593544	0.103839	0.481302	0.999046
								aug	Grassland	0.00146475	0.0193445	0.0404184	0.946649	0.281122	1	1		0.000152104	0.0758655	0.469784	0.0666516	0.592223	0.999853
								sep	Forest	0.000135062	0.000135062	0.923875	0.0324327	0.133548	0.00016349	0.000143143	0.000152104		0.821406	0.000135062	0.000135062	0.176051	0.0037519
								sep	Grassland	0.000135069	0.000135356	1	0.875596	0.99973	0.0999579	0.050144	0.0758655	0.821406		0.000199277	0.000136884	0.997721	0.422657
								oct	Forest	0.585228	0.975227	0.000159623	0.0263009	0.000170297	0.387878	0.593544	0.469784	0.000135062	0.000199277		0.998357	0.00335539	0.163326
								oct	Grassland	0.988091	1	0.000135684	0.00194344	0.000135451	0.0480026	0.103839	0.0666516	0.000135062	0.000136884	0.998357		0.000289509	0.0179199
								nov	Forest	0.000136386	0.00016683	0.98527	0.999985	1	0.669359	0.481302	0.592223	0.176051	0.997721	0.00335539	0.000289509		0.975911
								nov	Grassland	0.000533307	0.00528606	0.280629	0.999971	0.933644	0.999971	0.999046	0.999853	0.0037519	0.422657	0.163326	0.0179199	0.975911

## Sheet: Month
				800	Environment	Forest	Grassland
					Forest		0.00217646
					Grassland	0.00217646
				830	Environment	Forest	Grassland
					Forest		0.011749
					Grassland	0.011749
				900	Environment	Forest	Grassland
					Forest		0.383922
					Grassland	0.383922
				930	Environment	Forest	Grassland
					Forest		0.000486048
					Grassland	0.000486048
				1000	Environment	Forest	Grassland
					Forest		0.075852
					Grassland	0.075852
				1030	Environment	Forest	Grassland
					Forest		0.221618
					Grassland	0.221618
				1100	Environment	Forest	Grassland
					Forest		0.0119699
					Grassland	0.0119699
				1130	Environment	Forest	Grassland
					Forest		0.253415
					Grassland	0.253415
				1200	Environment	Forest	Grassland
					Forest		0.0149675
					Grassland	0.0149675
				1230	Environment	Forest	Grassland
					Forest		0.00121453
					Grassland	0.00121453

## Sheet: Environment
800	Month	may	jun	jul	aug	sep	oct	nov
	may		0.0140601	0.896128	0.000151991	0.000143395	0.000136144	0.000136144
	jun	0.0140601		0.189616	0.803587	0.5265	0.000136144	0.000136144
	jul	0.896128	0.189616		0.0013512	0.000653115	0.000136144	0.000136144
	aug	0.000151991	0.803587	0.0013512		0.999087	0.000136144	0.000136144
	sep	0.000143395	0.5265	0.000653115	0.999087		0.000136144	0.000136144
	oct	0.000136144	0.000136144	0.000136144	0.000136144	0.000136144		0.00013624
	nov	0.000136144	0.000136144	0.000136144	0.000136144	0.000136144	0.00013624
830	Month	may	jun	jul	aug	sep	oct	nov
	may		0.000136145	0.000136144	0.000136144	0.000136144	0.000136144	0.000136144
	jun	0.000136145		0.252196	0.000136144	0.000136144	0.000136144	0.000136144
	jul	0.000136144	0.252196		0.000136144	0.000136145	0.000136144	0.000136144
	aug	0.000136144	0.000136144	0.000136144		1	0.000136144	0.000136144
	sep	0.000136144	0.000136144	0.000136145	1		0.000136144	0.000136144
	oct	0.000136144	0.000136144	0.000136144	0.000136144	0.000136144		0.000136918
	nov	0.000136144	0.000136144	0.000136144	0.000136144	0.000136144	0.000136918
900	Month	may	jun	jul	aug	sep	oct	nov
	may		0.00118859	0.000209506	0.000136145	0.000136151	0.000136144	0.000136144
	jun	0.00118859		0.999981	0.114134	0.198763	0.0001365	0.000136144
	jul	0.000209506	0.999981		0.103307	0.246198	0.000136152	0.000136145
	aug	0.000136145	0.114134	0.103307		0.999959	0.00241142	0.000155567
	sep	0.000136151	0.198763	0.246198	0.999959		0.00195425	0.000142844
	oct	0.000136144	0.0001365	0.000136152	0.00241142	0.00195425		0.576832
	nov	0.000136144	0.000136144	0.000136145	0.000155567	0.000142844	0.576832
930	mes	5	6	7	8	9	10	11
	may		0.000256373	0.273989	0.000136151	0.000136457	0.000136144	0.000136144
	jun	0.000256373		0.0632958	0.763165	0.935774	0.0480127	0.00349002
	jul	0.273989	0.0632958		0.000276801	0.00154611	0.000136159	0.000136169
	aug	0.000136151	0.763165	0.000276801		0.999537	0.551922	0.165461
	sep	0.000136457	0.935774	0.00154611	0.999537		0.346823	0.067211
	oct	0.000136144	0.0480127	0.000136159	0.551922	0.346823		0.966281
	nov	0.000136144	0.00349002	0.000136169	0.165461	0.067211	0.966281
1000	mes	5	6	7	8	9	10	11
	may		0.000597594	0.0429312	0.000159294	0.00128129	0.0544039	0.000291167
	jun	0.000597594		0.544236	0.999986	0.99857	0.490175	0.999912
	jul	0.0429312	0.544236		0.267646	0.811014	1	0.347646
	aug	0.000159294	0.999986	0.267646		0.984595	0.22554	1
	sep	0.00128129	0.99857	0.811014	0.984595		0.762838	0.979996
	oct	0.0544039	0.490175	1	0.22554	0.762838		0.302877
	nov	0.000291167	0.999912	0.347646	1	0.979996	0.302877
1030	mes	5	6	7	8	9	10	11
	may		0.000462804	0.798682	0.0289637	0.230113	0.997849	0.000137612
	jun	0.000462804		0.0175833	0.565829	0.190336	0.000187946	0.811736
	jul	0.798682	0.0175833		0.507597	0.941323	0.396625	0.000350856
	aug	0.0289637	0.565829	0.507597		0.989978	0.0060059	0.0391687
	sep	0.230113	0.190336	0.941323	0.989978		0.0749814	0.00562146
	oct	0.997849	0.000187946	0.396625	0.0060059	0.0749814		0.000136307
	nov	0.000137612	0.811736	0.000350856	0.0391687	0.00562146	0.000136307
1100	mes	5	6	7	8	9	10	11
	may		0.000136157	0.422833	0.00138736	0.00372541	0.601672	0.000231744
	jun	0.000136157		0.00016961	0.0304079	0.023212	0.000148676	0.403588
	jul	0.422833	0.00016961		0.25979	0.377776	0.999947	0.0284458
	aug	0.00138736	0.0304079	0.25979		1	0.150673	0.884812
	sep	0.00372541	0.023212	0.377776	1		0.241291	0.841313
	oct	0.601672	0.000148676	0.999947	0.150673	0.241291		0.014282
	nov	0.000231744	0.403588	0.0284458	0.884812	0.841313	0.014282
1130	mes	5	6	7	8	9	10	11
	may		0.000143383	0.0262917	0.0962332	0.000169138	0.340603	0.000154963
	jun	0.000143383		0.1069	0.0344165	0.992879	0.00683082	0.999984
	jul	0.0262917	0.1069		0.998535	0.321906	0.884343	0.177721
	aug	0.0962332	0.0344165	0.998535		0.124972	0.995039	0.0630564
	sep	0.000169138	0.992879	0.321906	0.124972		0.0281277	0.999382
	oct	0.340603	0.00683082	0.884343	0.995039	0.0281277		0.0137045
	nov	0.000154963	0.999984	0.177721	0.0630564	0.999382	0.0137045
1200	mes	5	6	7	8	9	10	11
	may		0.000136189	0.0062406	0.000149987	0.000136144	0.000455068	0.000149254
	jun	0.000136189		0.0180689	0.490114	0.4212	0.134976	0.849087
	jul	0.0062406	0.0180689		0.599737	0.000141325	0.962927	0.341717
	aug	0.000149987	0.490114	0.599737		0.00229603	0.981089	0.996636
	sep	0.000136144	0.4212	0.000141325	0.00229603		0.000290611	0.026291
	oct	0.000455068	0.134976	0.962927	0.981089	0.000290611		0.830759
	nov	0.000149254	0.849087	0.341717	0.996636	0.026291	0.830759
1230	Month	may	jun	jul	aug	sep	oct	nov
	may		0.000136144	0.000136144	0.000139068	0.000136144	0.473389	0.000136145
	jun	0.000136144		0.63247	0.00724303	0.154807	0.000136148	0.767578
	jul	0.000136144	0.63247		0.249279	0.000782962	0.000136269	0.99999
	aug	0.000139068	0.00724303	0.249279		0.000136229	0.00358635	0.260798
	sep	0.000136144	0.154807	0.000782962	0.000136229		0.000136144	0.00323129
	oct	0.473389	0.000136148	0.000136269	0.00358635	0.000136144		0.000139636
	nov	0.000136145	0.767578	0.99999	0.260798	0.00323129	0.000139636
